# Supplementary material for: Design of low-lattice-mismatch type-I heterostructures of zinc chalcogenide and synthesis of ZnTeS quantum dots as key materials for realizing green and red emission
Source: Royal Society of Chemistry journal article supplement (doi:10.1039/d4tc04696j), 2025-01-01
Supplement: d4tc04696j1.pdf [file d4tc04696j1.pdf]

## Supplementary Information

### Design of low-lattice-mismatch and type-I heterostructures of zinc chalcogenide and synthesis of ZnTeS quantum dots as key materials for realizing green and red emission

Rantaro Matsuo,<sup>a</sup> Masao Kita,<sup>b</sup> Satoshi Tsukuda,<sup>a,c,\*</sup> and Takahisa Omata<sup>a,\*</sup>

<sup>a</sup>*Institute of Multidisciplinary Research for Advanced Materials (IMRAM), Tohoku University, 2-1-1 Katahira, Aoba-ku, Sendai 980-8577, Japan*

<sup>b</sup>*Department of Mechanical Engineering, National Institute of Technology, Toyama College, Toyama 939-8630, Japan*

<sup>c</sup>*Department of Materials and Life Science, Faculty of Science and Technology, Shizuoka Institute of Science and Technology, 2200-2, Toyosawa, Fukuroi, Shizuoka 437-8555, Japan*

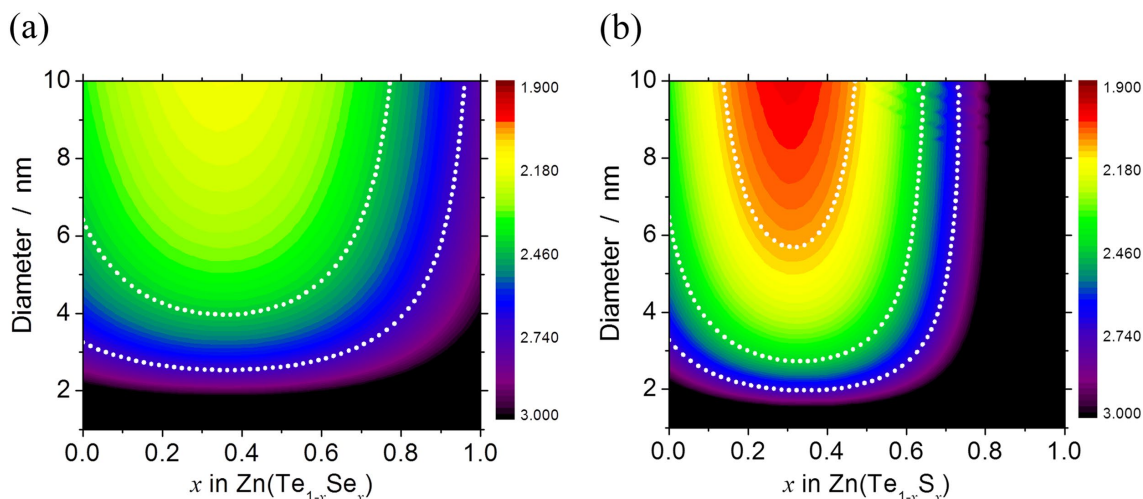

**Figure S1.** Two-dimensional contour plots of optical gap of (a) Zn(Te<sub>1-x</sub>Se<sub>x</sub>) and (b) Zn(Te<sub>1-x</sub>S<sub>x</sub>) alloyed QDs as a function of composition and size. Colors correspond to the energy indicated by the color bar. White dotted lines indicate size and composition of alloyed QDs expected to emit blue, green, and red light assuming 100 meV of Stokes shift.<sup>S1</sup>

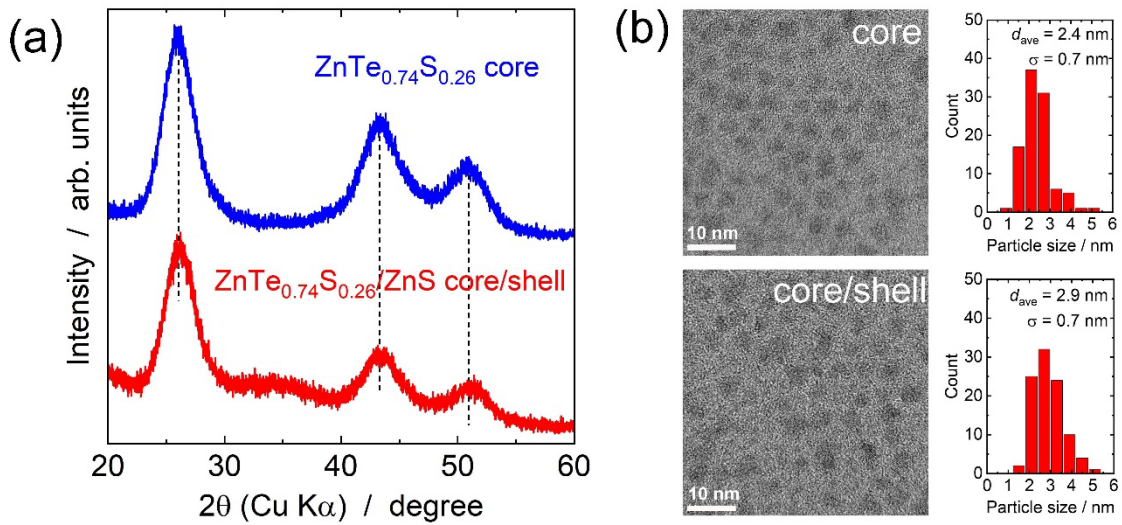

**Figure S2.** (a) X-ray diffraction patterns and (b) High resolution transmission electron microscopy (HRTEM) images and particle size distribution obtained from the HRTEM images of ZnTe<sub>0.74</sub>S<sub>0.26</sub> core and ZnTe<sub>0.74</sub>S<sub>0.26</sub>/ZnS core/shell QDs.

## References

- (S1) Asano, H.; Omata, T. Design of cadmium-free colloidal II–VI semiconductor quantum dots exhibiting RGB emission. *AIP Adv.* **2017**, *7*, 045309. <https://dx.doi.org/10.1063/1.4982256>
